# Supplementary material for: Crl activates transcription by stabilizing active conformation of the master stress transcription initiation factor
Source: eLife. 2019 Dec 17;8:e50928. doi: 10.7554/eLife.50928 (PMC6917491; doi:10.7554/eLife.50928)
Supplement: Figure 3—source data 1. [file elife-50928-fig3-data1.xlsx]

## Sheet: Figure 3A
Figure 3A
Replicate 1				Replicate 2				Replicate 3
1				2				3
	None	Crl(WT)			None	Crl(WT)			None	Crl(WT)
RNAP concentration(nM)	Fluorescence Polarization（mP）	Fluorescence Polarization（mP）		RNAP concentration(nM)	Fluorescence Polarization（mP）	Fluorescence Polarization（mP）		RNAP concentration(nM)	Fluorescence Polarization（mP）	Fluorescence Polarization（mP）
0	187	190		0	184	188		0	188	189
2	192	201		2	186	202		2	190	196
4	195	212		4	193	213		4	198	207
8	201	223		8	199	224		8	199	218
16	209	234		16	206	231		16	209	229
32	221	242		32	218	236		32	219	238
64	227	246		64	226	246		64	233	242
128	235	250		128	235	251		128	237	245
256	247	252		256	247	254		256	244	252
512	249	256		512	246	257		512	248	255
1024	252	257		1024	251	256		1024	251	257
	RNAP-holo concentration(nM)	None			Average	SD				RNAP-holo concentration(nM)	Crl(WT)			Average	SD
	0	187	184	188	186.333	2.00924				0	190	188	189	189	1
	2	192	186	190	189.333	2.14303				2	201	202	196	199.667	3.21455
	4	195	193	198	195.333	2.50185				4	212	213	207	210.667	3.21455
	8	201	199	199	199.667	0.3849				8	223	224	218	221.667	3.21455
	16	209	206	209	208	1.52753				16	234	231	229	231.333	2.51661
	32	221	218	219	219.333	0.693889				32	242	236	238	238.667	3.05505
	64	227	226	233	228.667	3.53291				64	246	246	242	244.667	2.3094
	128	235	235	237	235.667	1.01835				128	250	251	245	248.667	3.21455
	256	247	247	244	246	1.52753				256	252	254	252	252.667	1.1547
	512	249	246	248	247.667	1.07152				512	256	257	255	256	1
	1024	252	251	251	251.333	0.19245				1024	257	256	257	256.667	0.57735

## Sheet: Figure 3B
Figure 3B
Replicate 1								Replicate 2								Replicate 3
	None	Crl(WT)	Crl(ΔN-tail)	Crl(ΔR-loop)	Crl(ΔN-tail/ΔR-loop)				None	Crl(WT)	Crl(ΔN-tail)	Crl(ΔR-loop)	Crl(ΔN-tail/ΔR-loop)				None	Crl(WT)	Crl(ΔN-tail)	Crl(ΔR-loop)	Crl(ΔN-tail/ΔR-loop)
RNAP concentration(nM)	Fluorescence Polarization（mP）	Fluorescence Polarization（mP）	Fluorescence Polarization（mP）	Fluorescence Polarization（mP）	Fluorescence Polarization（mP）			RNAP concentration(nM)	Fluorescence Polarization（mP）	Fluorescence Polarization（mP）	Fluorescence Polarization（mP）	Fluorescence Polarization（mP）	Fluorescence Polarization（mP）			RNAP concentration(nM)	Fluorescence Polarization（mP）	Fluorescence Polarization（mP）	Fluorescence Polarization（mP）	Fluorescence Polarization（mP）	Fluorescence Polarization（mP）
0	184	190	190	187	185			0	186	188	191	186	188			0	188	190	190	186	188
2	190	203	196	189	192			2	187	204	197	189	192			2	191	196	197	189	191
4	196	211	201	199	197			4	193	214	202	193	193			4	198	206	205	193	196
8	198	224	210	206	202			8	199	222	214	204	200			8	198	218	214	202	202
16	209	235	221	214	207			16	207	233	225	213	208			16	209	229	224	211	208
32	220	244	233	224	224			32	219	234	236	223	219			32	218	236	234	223	220
64	226	246	240	232	231			64	226	247	242	230	233			64	231	241	244	233	230
128	238	250	245	238	240			128	237	252	247	238	240			128	238	244	248	239	240
256	247	252	252	244	247			256	246	253	251	245	245			256	245	252	250	246	245
512	250	256	252	249	251			512	247	255	255	249	250			512	250	255	254	248	250
1024	251	259	259	251	253			1024	250	254	257	253	253			1024	251	258	256	253	251
				RNAP-holo concentration(nM)	None			Average	SD				RNAP-holo concentration(nM)	Crl(WT)			Average	SD
				0	184	186	188	186	2				0	190	188	190	189.333	1.1547
				2	190	187	191	189.333	2.08167				2	203	204	196	201	4.3589
				4	196	193	198	195.667	2.51661				4	211	214	206	210.333	4.04145
				8	198	199	198	198.333	0.57735				8	224	222	218	221.333	3.05505
				16	209	207	209	208.333	1.1547				16	235	233	229	232.333	3.05505
				32	220	219	218	219	1				32	244	234	236	238	5.2915
				64	226	226	231	227.667	2.88675				64	246	247	241	244.667	3.21455
				128	238	237	238	237.667	0.57735				128	250	252	244	248.667	4.16333
				256	247	246	245	246	1				256	252	253	252	252.333	0.57735
				512	250	247	250	249	1.73205				512	256	255	255	255.333	0.57735
				1024	251	250	251	250.667	0.57735				1024	259	254	258	257	2.64575
	RNAP-holo concentration(nM)	Crl(ΔN-tail)			Average	SD			RNAP-holo concentration(nM)	Crl(ΔR-loop)			Average	SD			RNAP-holo concentration(nM)	Crl(ΔN-tail/ΔR-loop)			Average	SD
	0	190	191	190	190.333	0.57735			0	187	186	186	186.333	0.57735			0	185	188	188	187	1.73205
	2	196	197	197	196.667	0.57735			2	189	189	189	189	0			2	192	192	191	191.667	0.57735
	4	201	202	205	202.667	2.08167			4	199	193	193	195	3.4641			4	197	193	196	195.333	2.08167
	8	210	214	214	212.667	2.3094			8	206	204	202	204	2			8	202	200	202	201.333	1.1547
	16	221	225	224	223.333	2.08167			16	214	213	211	212.667	1.52753			16	207	208	208	207.667	0.57735
	32	233	236	234	234.333	1.52753			32	224	223	223	223.333	0.57735			32	224	219	220	221	2.64575
	64	240	242	244	242	2			64	232	230	233	231.667	1.52753			64	231	233	230	231.333	1.52753
	128	245	247	248	246.667	1.52753			128	238	238	239	238.333	0.57735			128	240	240	240	240	0
	256	252	251	250	251	1			256	244	245	246	245	1			256	247	245	245	245.667	1.1547
	512	252	255	254	253.667	1.52753			512	249	249	248	248.667	0.57735			512	251	250	250	250.333	0.57735
	1024	259	257	256	257.333	1.52753			1024	251	253	253	252.333	1.1547			1024	253	253	251	252.333	1.1547
